# Supplementary material for: Temperature dependence of radiative and non-radiative decay in the luminescence of one-dimensional pyridinium lead halide hybrids
Source: Royal Society of Chemistry journal article supplement (doi:10.1039/d3cp02186f), 2023-01-01
Supplement: d3cp02186f1.pdf [file d3cp02186f1.pdf]

## Supporting Information

### Temperature dependence of radiative and non-radiative decay in the luminescence of one-dimensional pyridinium lead halide hybrids

Abdulrahman M. Alfaraidi, Jonas Schaab, Eric T. McClure, Mike Kellogg, Taylor L. Hodgkins, Muazzam Idris, Peter I. Djurovich, Stephen E. Bradforth, Brent C. Melot, Mark E. Thompson\*

*Department of Chemistry, University of Southern California, Los Angeles, CA, USA*

### Table of Contents

|                                                                                                                                                                                                      |    |
|------------------------------------------------------------------------------------------------------------------------------------------------------------------------------------------------------|----|
| Figure S1. Band structures calculated for (pyH)PbBr <sub>3</sub> and (pyH)PbI <sub>3</sub> . .....                                                                                                   | S2 |
| Figure S2. Temperature dependence of the integrated luminescence intensity for (pyH)PbBr <sub>3</sub> for emission bands at high (left) and low (right) energy. ....                                 | S2 |
| Figure S3. Arrhenius fit to the temperature dependence for the low (left) and high (right) energy luminescence from (pyH)PbBr <sub>3</sub> . ....                                                    | S3 |
| Figure S4. Temperature dependence of the luminescence peak maxima and linewidth at high energy (left) and low energy (right) for (pyH)PbBr <sub>3</sub> . ....                                       | S3 |
| Figure S5. Temperature dependence of integrated emission intensity (left) and Arrhenius fit to the temperature dependence for the luminescence from (pyH)PbI <sub>3</sub> for T > 80 K (right). .... | S4 |
| Figure S6. Temperature dependence of the luminescence peak maxima and linewidth for (pyH)PbI <sub>3</sub> . ....                                                                                     | S4 |
| Table S1. Powder X-ray data collection parameters for (pyH)PbBr <sub>3</sub> and (pyH)PbI <sub>3</sub> . ....                                                                                        | S5 |
| Table S2. Fit parameters for luminescence power dependence data from (pyH)PbI <sub>3</sub> and reference material, aluminum quinolate (AlQ <sub>3</sub> ). ....                                      | S5 |

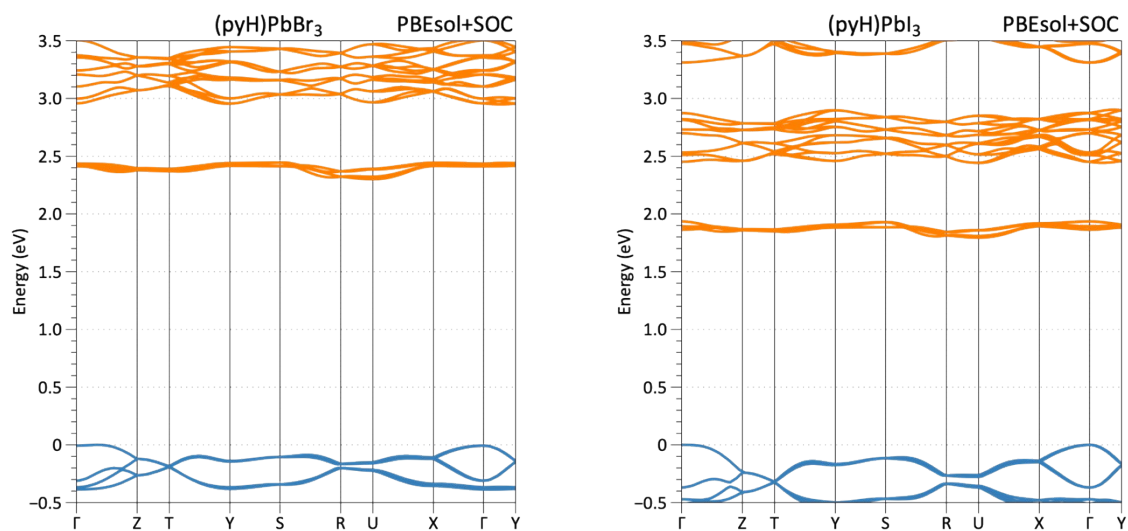

**Figure S1.** Band structures calculated for (pyH)PbBr<sub>3</sub> and (pyH)PbI<sub>3</sub>.

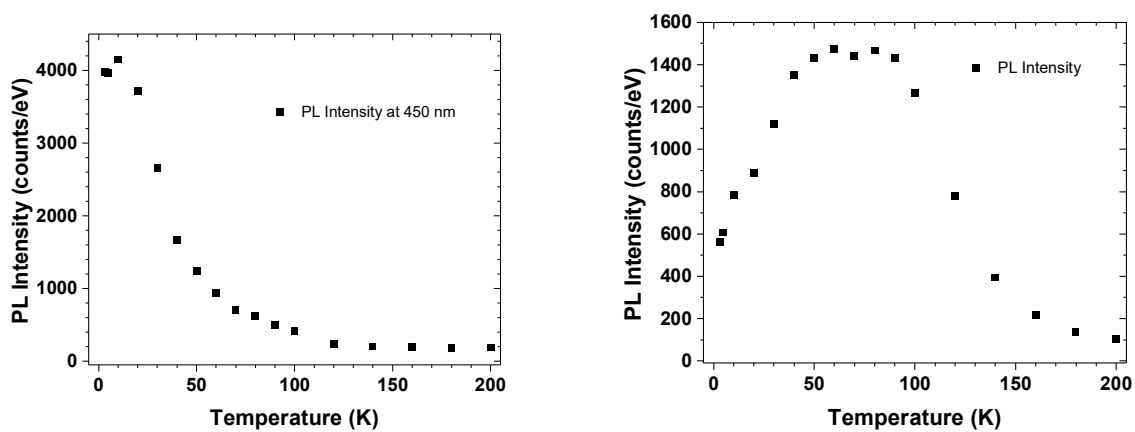

**Figure S2.** Temperature dependence of the integrated luminescence intensity for (pyH)PbBr<sub>3</sub> for emission bands at high (left) and low (right) energy.

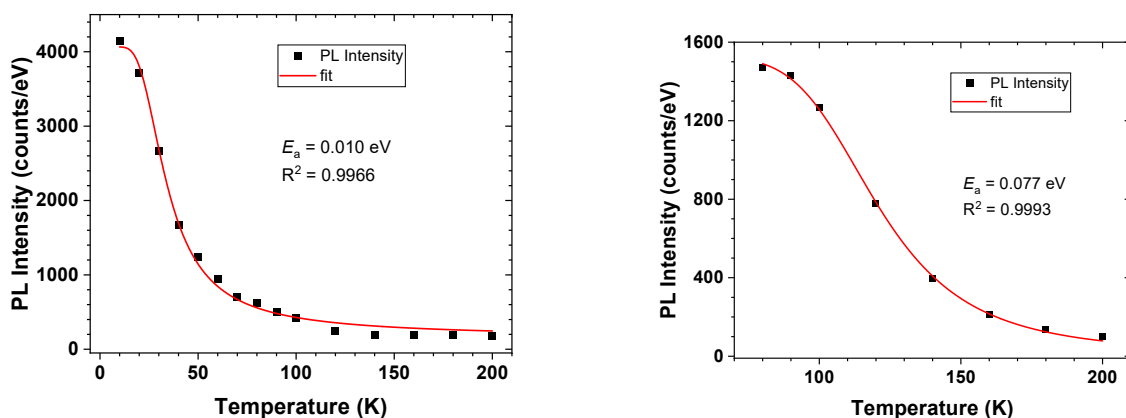

**Figure S3.** Arrhenius fit to the temperature dependence for the low (left) and high (right) energy luminescence from (pyH)PbBr<sub>3</sub>.

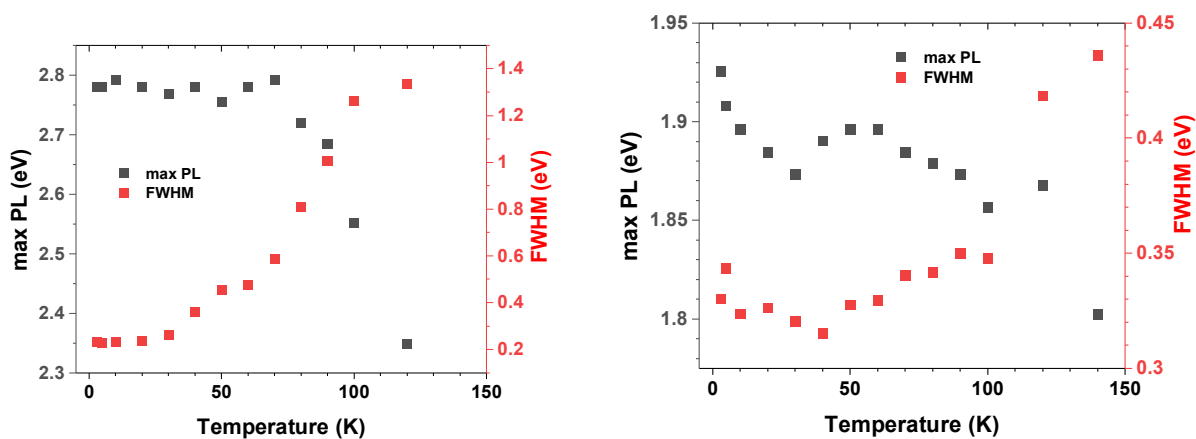

**Figure S4.** Temperature dependence of the luminescence peak maxima and linewidth at high energy (left) and low energy (right) for (pyH)PbBr<sub>3</sub>.

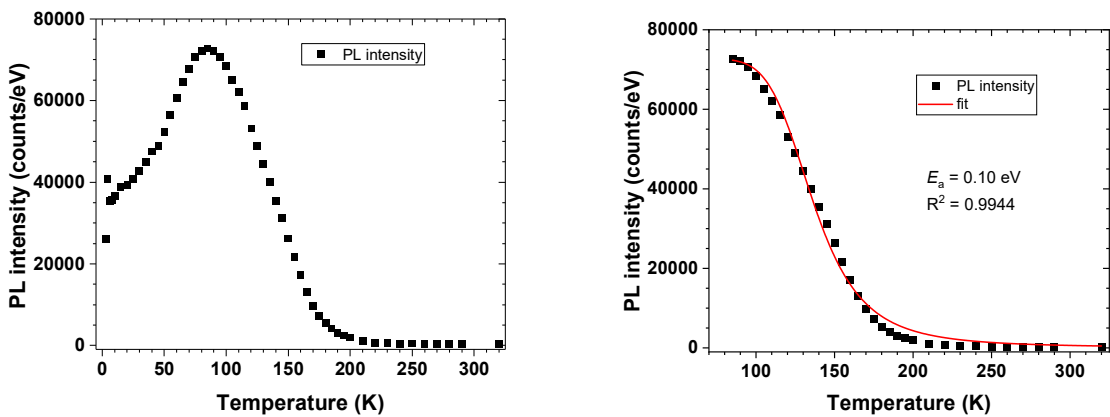

**Figure S5.** Temperature dependence of integrated emission intensity (left) and Arrhenius fit to the temperature dependence for the luminescence from (pyH)PbI<sub>3</sub> for T > 80 K (right).

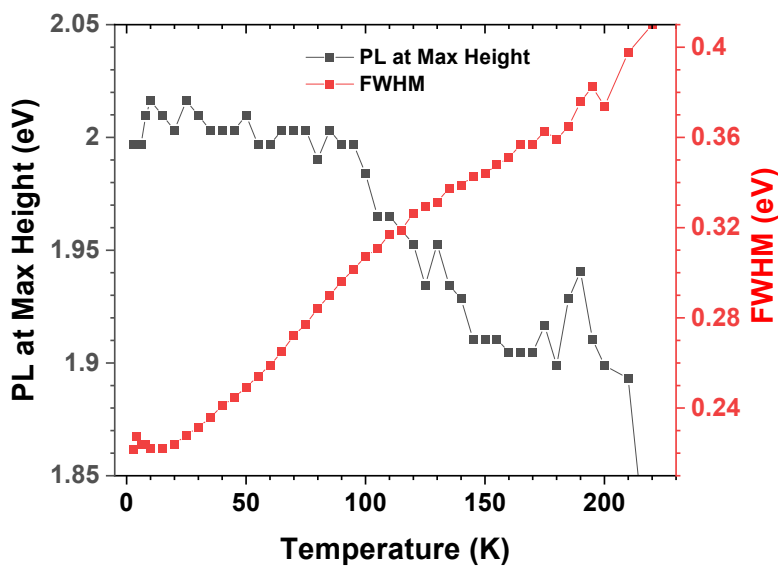

**Figure S6.** Temperature dependence of the luminescence peak maxima and linewidth for (pyH)PbI<sub>3</sub>.

**Table S1.** Powder X-ray data collection parameters for (pyH)PbBr<sub>3</sub> and (pyH)PbI<sub>3</sub>.

|                          |                                                                             |                                                                              |
|--------------------------|-----------------------------------------------------------------------------|------------------------------------------------------------------------------|
| Compound                 | (pyH)PbI <sub>3</sub>                                                       | (pyH)PbBr <sub>3</sub>                                                       |
| Chemical formula         | C <sub>5</sub> N <sub>1</sub> H <sub>6</sub> Pb <sub>1</sub> I <sub>3</sub> | C <sub>5</sub> N <sub>1</sub> H <sub>6</sub> Pb <sub>1</sub> Br <sub>3</sub> |
| Space group              | <i>Pnma</i> (#62)                                                           | <i>Pnma</i> (#62)                                                            |
| <i>a</i> (Å)             | 14.9839(8)                                                                  | 14.348(6)                                                                    |
| <i>b</i> (Å)             | 8.1067(4)                                                                   | 7.740(3)                                                                     |
| <i>c</i> (Å)             | 9.9103(7)                                                                   | 9.474(5)                                                                     |
| Volume (Å <sup>3</sup> ) | 1203.8                                                                      | 1052.1                                                                       |
| <i>Z</i>                 | 4                                                                           |                                                                              |
| Source                   | Cu K <sub>α</sub> radiation                                                 |                                                                              |
| Wavelength               | 1.5406 / 1.5444 Å                                                           |                                                                              |
| Collection temperature   | 295 K                                                                       |                                                                              |
| Step size (° 2θ)         | 0.015                                                                       |                                                                              |
| Time per step (sec)      | 2.0                                                                         |                                                                              |
| Angular range (° 2θ)     | 5–100                                                                       |                                                                              |
| R <sub>wp</sub>          | 5.799 (Rietveld)                                                            | 7.510 (WPPF)                                                                 |

**Table S2.** Fit parameters for luminescence power dependence data from (pyH)PbI<sub>3</sub> and reference material, aluminum quinolate (AlQ<sub>3</sub>).

|                               | <i>n</i> (low power) | <i>a</i> (low power)  | <i>n</i> (high power) | <i>a</i> (high power) |
|-------------------------------|----------------------|-----------------------|-----------------------|-----------------------|
| (pyH)PbI <sub>3</sub> , 77 K  | 0.90                 | 1.9 x 10 <sup>5</sup> | 1.30                  | 2.6 x 10 <sup>5</sup> |
| (pyH)PbI <sub>3</sub> , 3.1 K | 0.67                 | 1.5 x 10 <sup>5</sup> | 1.50                  | 2.0 x 10 <sup>5</sup> |
| AlQ <sub>3</sub> , 300 K      | --                   | --                    | 0.97                  | 4.3 x 10 <sup>5</sup> |

$$fit = a \cdot x^n$$
